# Supplementary material for: PCIF1-mediated deposition of 5′-cap N6,2′-O-dimethyladenosine in ACE2 and TMPRSS2 mRNA regulates susceptibility to SARS-CoV-2 infection
Source: PubMed Central journal article supplement — Proc Natl Acad Sci U S A. 2023 Jan 23;120(5):e2210361120. doi: 10.1073/pnas.2210361120 (PMC9945940; doi:10.1073/pnas.2210361120), 2023-01-23
Supplement: pnas.2210361120.sapp.pdf [file pnas.2210361120.sapp.pdf]

Fig.S1

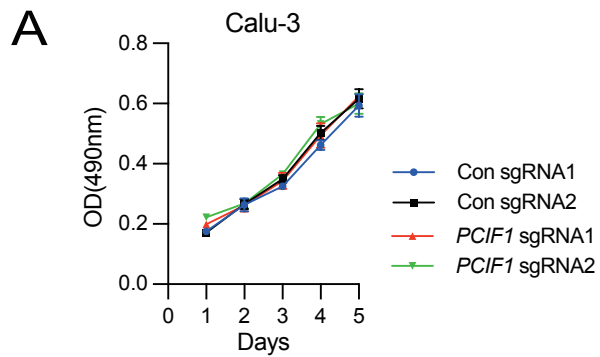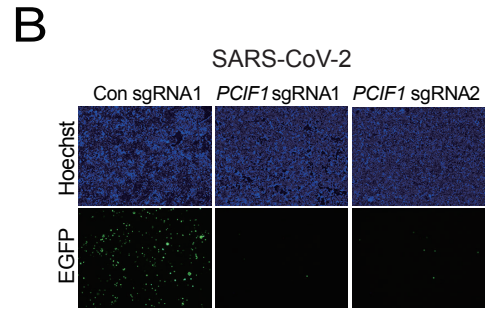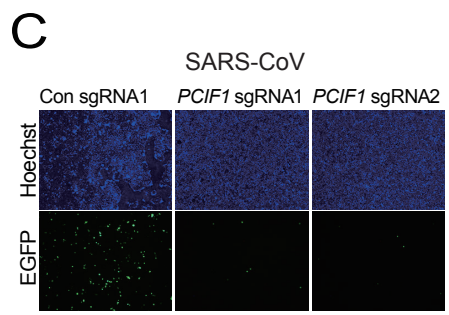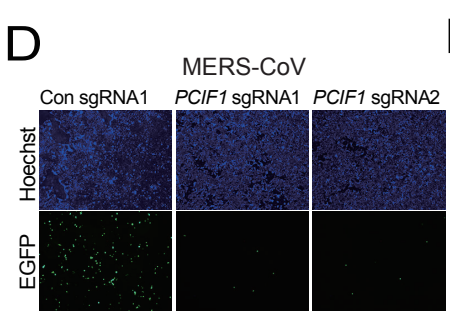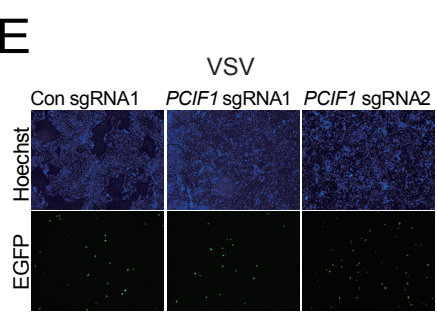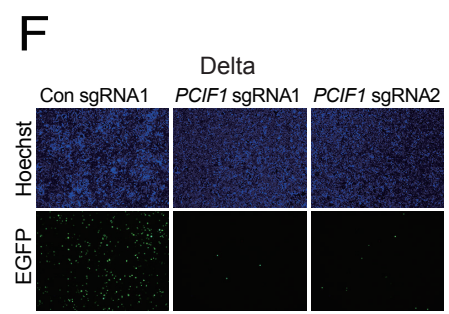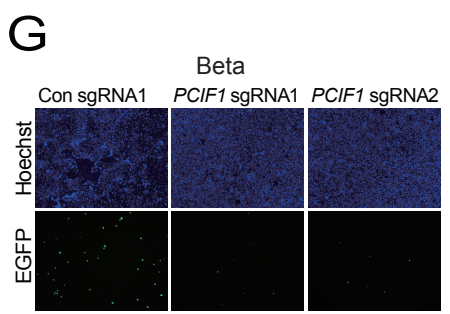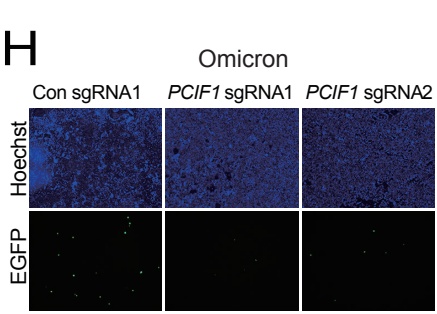

**Fig. S1. PCIF1 knockout blocks viral entry in Calu-3 cells.**

**A**, MTS cellular proliferation assay of control and PCIF1-depleted Calu-3 cells. Data are mean  $\pm$  SD of n=3. **B-H**, Fluorescence microscopy images of PCIF1-KO and control Calu-3 cells infected with EGFP-expressing SARS-CoV-2 (**B**), SARS-CoV (**C**), MERS-CoV (**D**), VSV (**E**), Delta (**F**), Beta (**G**) and Omicron (**H**) pseudoviruses. Nuclei were stained with Hoechst 33342.

Fig.S2

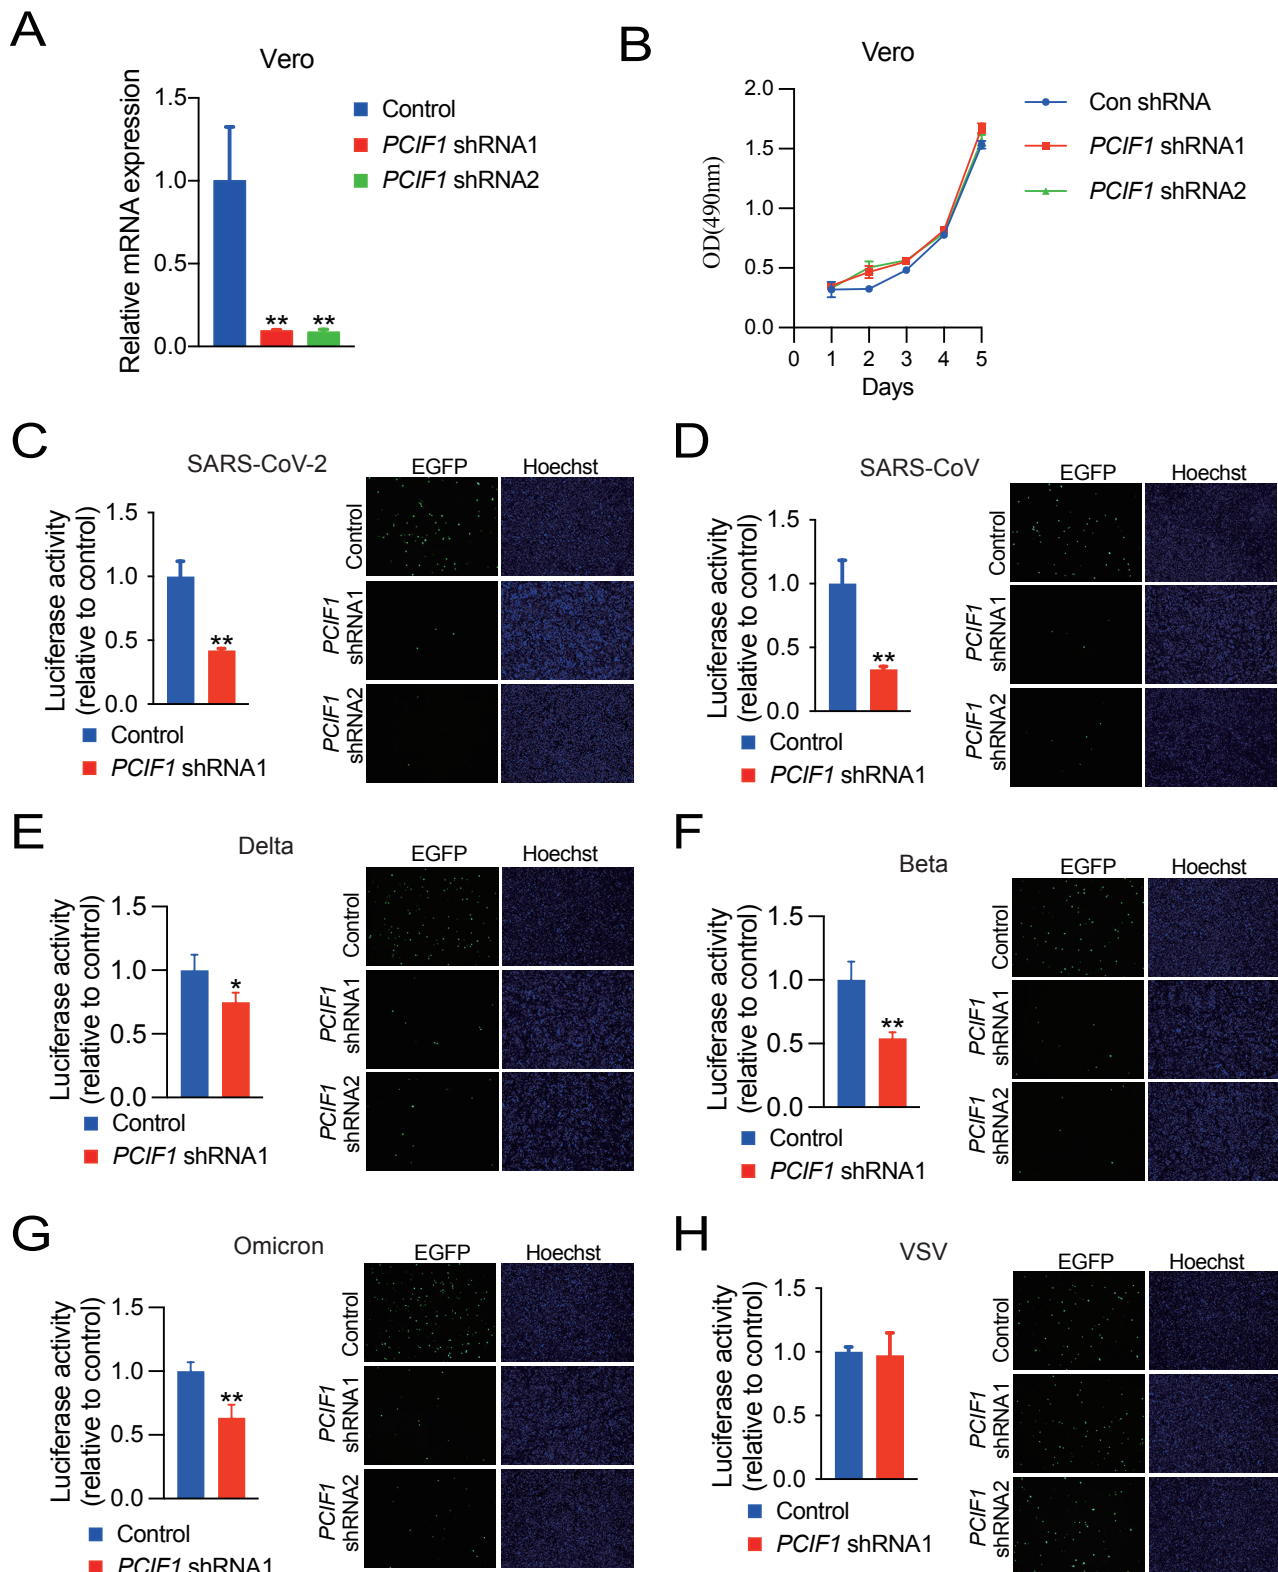

**Fig. S2. Depletion of PCIF1 inhibits pseudovirus infection in Vero cells.**

**A**, qRT-PCR analysis of Vero cells transfected with control and *PCIF1*-targeting shRNAs. Data are presented as the mean  $\pm$  S.D. (n=3). \*\*P < 0.01 by Student's t-test. **B**, MTS cellular proliferation assay of control and PCIF1 knockdown Vero cells. Data are mean  $\pm$  SD of n=3. **C-H**, Luciferase quantification (left panels) and fluorescence microscopy imaging (right panels) of infection of PCIF1-KD and control Vero cells with luciferase- or EGFP-expressing SARS-CoV-2 (C), SARS-CoV (D), Delta (E), Beta (F), Omicron (G), or VSV (H) pseudoviruses. Nuclei were stained with Hoechst 33342. Data are presented as the mean  $\pm$  S.D. (n=3). \*P < 0.05, \*\*P < 0.01 by Student's t-test.

Fig.S3

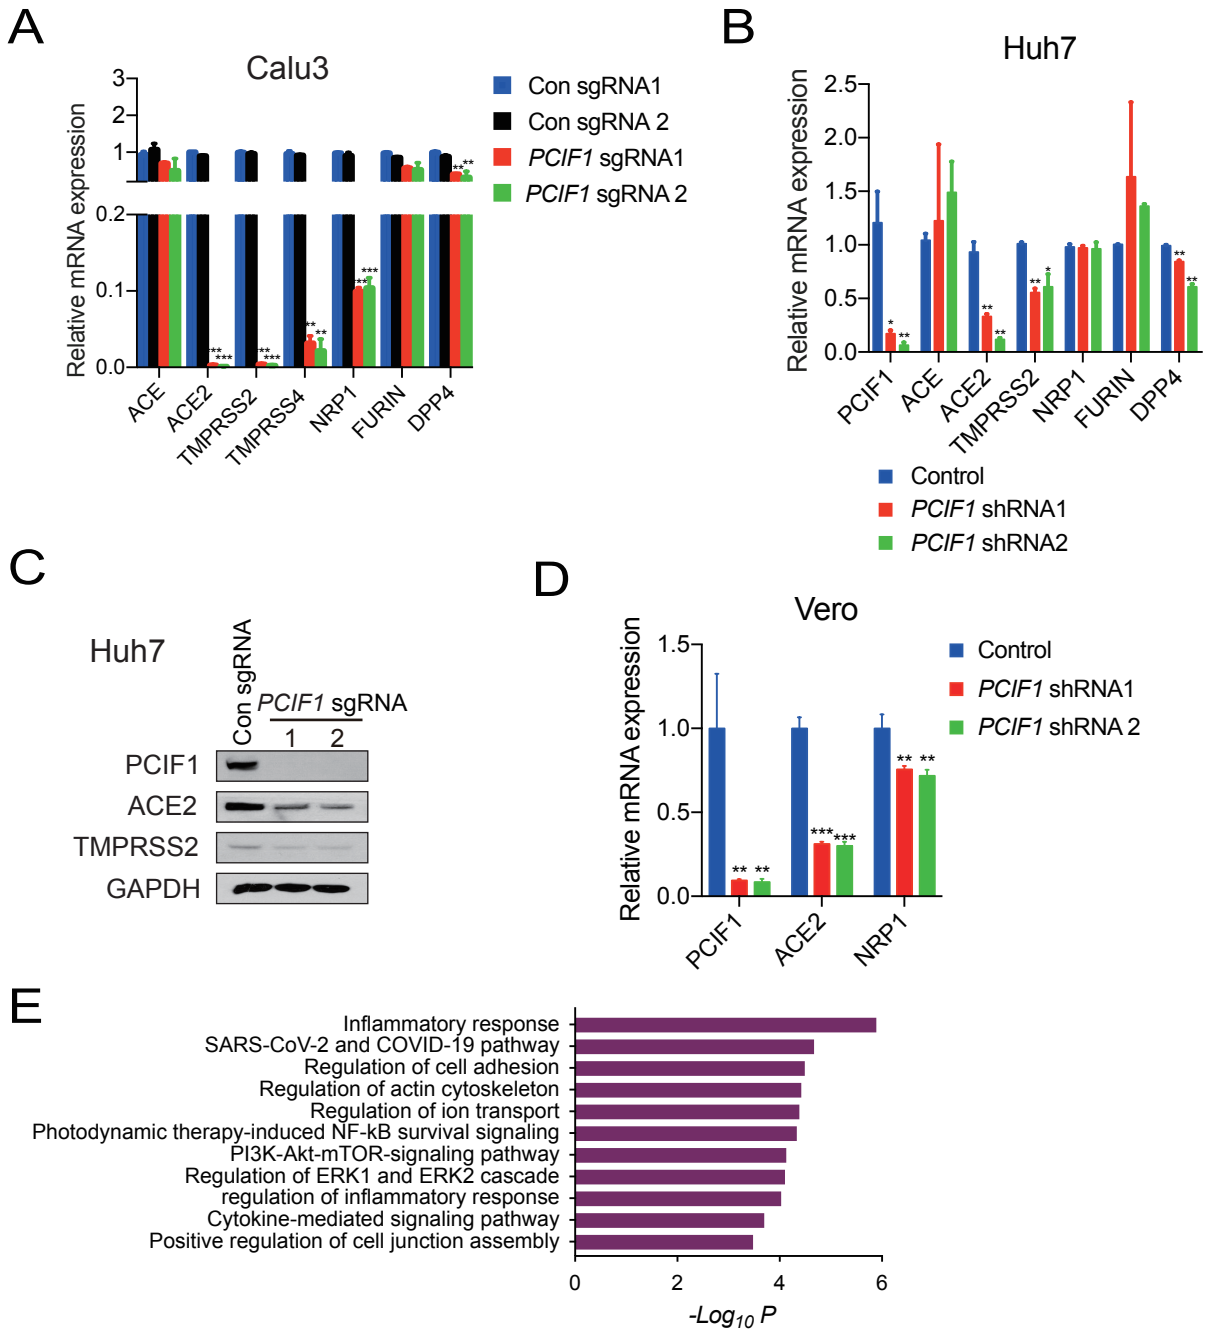

**Fig. S3. Validation of altered gene expression upon PCIF1 depletion in multiple cell lines.**

**A, B**, qRT-PCR analysis of the indicated genes identified from the RNA-seq data. Data are presented as the fold change in mRNA levels in PCIF1-KO Calu-3 cells (a) or PCIF1-KD Huh7 cells (b) relative to the corresponding control cells. Data are presented as the mean  $\pm$  S.D. (n=3). \*P < 0.05, \*\*P < 0.01, \*\*\*P < 0.001 by Student's t-test. **C**, Western blot analysis of PCIF1, ACE2, and TMPRSS2 protein levels in control and PCIF1-KO Huh7 cells. GAPDH served as a loading control. **D**, qRT-PCR analysis of *PCIF1*, *ACE2*, and *NRP1* mRNA levels in PCIF1-KD Vero cells relative to control cells. Data are presented as the mean  $\pm$  S.D. (n=3). \*\*P < 0.01, \*\*\*P < 0.001 by Student's t-test. **E**, Summary of the meta-enrichment analysis for the 172 m<sup>6</sup>A<sub>m</sub>-modified genes downregulated by PCIF1-KO in Calu-3 cells (shown in Figure 2d).

**Table S1: qPCR Primers**

| Genes Name                       | 5'-3'                                                       |
|----------------------------------|-------------------------------------------------------------|
| <i>PCIF1</i>                     | GGAGAATCGTCCCTACTACTT/ GCTTTCTGGGCTTGTCT                    |
| <i>GAPDH</i>                     | GTGGACCTGACCTGCCGTCT/ GGAGGAGTGGGTGTCGCTGT                  |
| <i>ACE</i>                       | CCGAAATACGTGGAACATCAA/ CACGAGTCCCCTGCATCTACA                |
| <i>ACE2</i>                      | TGGGACTCTGCCATTTACTTAC/ CCCAACTATCTCTCGCTTCATC              |
| <i>TMPRSS2</i>                   | GGAGTGTACGGGAATGTGATG/ GGACGAAGACCATGTGGATTAG               |
| <i>TMPRSS4</i>                   | CCATCTGTCTGCCCTTCTTT/ GTCAGACATCTTCCCTCCATTC                |
| <i>NRP1</i>                      | GTCTGCCCTGGAGAACTATAAC/ CCTTCATGCCTCCGAATAAGTA              |
| <i>FURIN</i>                     | GACGGCTACACCAACAGTATC/ GTCACGATCTGCTTCTCATTCT               |
| <i>DPP4</i>                      | TGTGAGCTGAATCCGGAAAG/ CACGCTGCTGTGTAGAGTATAG                |
| <i>Nucleocapsid</i>              | CACATTGGCACCCGCAATC/ GAGGAACGAGAAGAGGCTTG                   |
| <i>ACE2</i> m <sup>6</sup> Am    | CATACACTCTGGCAATGAGGACACT/<br>GGGATCACAACAACATAGAATTCAAAGAG |
| <i>TMPRSS2</i> m <sup>6</sup> Am | GGCGCGAGCTAAGCAGGA/ TCCAGGCGGCGCTCCCCG                      |
| <i>FURIN</i> m <sup>6</sup> Am   | GATAGGAGCCTGACTGTTGCAG/ CTCCAGAGCACCTGGGATTCA               |
